# Supplementary material for: The MEK/ERK/miR-21 Signaling Is Critical in Osimertinib Resistance in EGFR-Mutant Non-Small Cell Lung Cancer Cells
Source: MDPI journal article supplement (doi:10.3390/cancers13236005), 2021-11-29

## SUPPLEMENTARY INFORMATION

The MEK/ERK/miR-21 signaling is critical in Osimertinib resistance in EGFR-mutant non-small cell lung cancer cells

Wen-Chien Huang<sup>1,2</sup>, Vijesh Kumar Yadav<sup>3</sup>, Wei-Hong Cheng<sup>4</sup>, Chun-Hua Wang<sup>5,6</sup>, Ming-Shou Hsieh<sup>3</sup>, Ting-Yi Huang<sup>3</sup>, Shiou-Fu Lin<sup>7</sup>, Chi-Tai Yeh<sup>3,4,8</sup>, Kuang-Tai Kuo<sup>9,10\*</sup>

1 Department of Medicine, MacKay Medical College, New Taipei City, 252, Taiwan.

2 Division of Thoracic Surgery, Department of Surgery, MacKay Memorial Hospital, Taipei, 104, Taiwan.

3 Department of Medical Research & Education, Taipei Medical University - Shuang Ho Hospital New Taipei City, 235, Taiwan.

4 Division of Hematology and Oncology, Department of Internal Medicine, Taipei Medical University-Shuang Ho Hospital, New Taipei City 235, Taiwan.

5 Department of Dermatology, Taipei Tzu Chi Hospital, Buddhist Tzu Chi Medical Foundation, New Taipei City, 231, Taiwan.

6 School of Medicine, Buddhist Tzu Chi University, Hualien, 970, Taiwan.

7 Department of Pathology, Taipei Medical University - Shuang Ho Hospital, New Taipei City, 235, Taiwan.

8 Department of Medical Laboratory Science and Biotechnology, Yuanpei University of Medical Technology, Hsinchu 300, Taiwan.

9 Division of Thoracic Surgery, Department of Surgery, School of Medicine, College of Medicine, Taipei Medical University, Taipei, 110, Taiwan.

10 Division of Thoracic Surgery, Department of Surgery, Taipei Medical University - Shuang Ho Hospital, New Taipei City, 235, Taiwan.

\* Correspondence: Email: [ktkuo@tmu.edu.tw](mailto:ktkuo@tmu.edu.tw); Tel.: +886-2-2490088 ext. 8119

**Supplementary Table S1. Clinicopathological characteristics of NSCLC patients (N=20)**

| Parameters                      | N          | %    |
|---------------------------------|------------|------|
| Age (years)                     | 56.4 ± 2.8 |      |
| Gender (male)                   | 20         | 100% |
| Smoke (n/%)                     | 16         | 75%  |
| Histology                       |            |      |
| Adenocarcinoma (n/%)            | 16         | 60%  |
| Squamous cell carcinoma (n/%)   | 4          | 40%  |
| Pathological grade              |            |      |
| Poorly differentiated (n/%)     | 16         | 80%  |
| Moderately differentiated (n/%) | 3          | 15%  |
| Well-differentiated (n/%)       | 1          | 5%   |
| Tumor size                      |            |      |
| > 5 cm (n/%)                    | 10         | 50%  |
| ≤ 5 cm (n/%)                    | 10         | 50%  |
| Osimertinib responder           |            |      |
| Yes (n/%)                       | 10         | 50%  |
| No (n/%)                        | 10         | 50%  |

**Supplementary Table S2. qPCR primers**

| <b>Gene name</b> | <b>Forward sequence</b> | <b>Reverse sequence</b> |
|------------------|-------------------------|-------------------------|
| FAP              | ATGAGCTTCCTCGTCCAATTCA  | AGACCACCAGAGAGCATATTTTG |
| ERK              | ATGTCATCGGCATCCGAGAC    | GGATCTGGTAGAGGAAGTAGCA  |
| STAT3            | CAGCAGCTTGACACACGGTA    | AAACACCAAAGTGGCATGTGA   |
| VIM              | GACGCCATCAACACCGAGTT    | CTTTGTCGTTGGTTAGCTGGT   |
| A-SMA            | AAAAGACAGCTACGTGGGTGA   | GCCATGTTCTATCGGGTACTTC  |
| E-cad            | CGAGAGCTACACGTTCACGG    | GGGTGTCGAGGGAAAAATAGG   |
| $\beta$ -actin   | CTGTCTGGCGGCACCACCAT    | GCAACTAAGTCATAGTCCGC    |

**Supplementary Figure S1** The representative examples of Osimertinib-resistant and Osimertinib-sensitive cell lines deriving from patients (computed tomography).

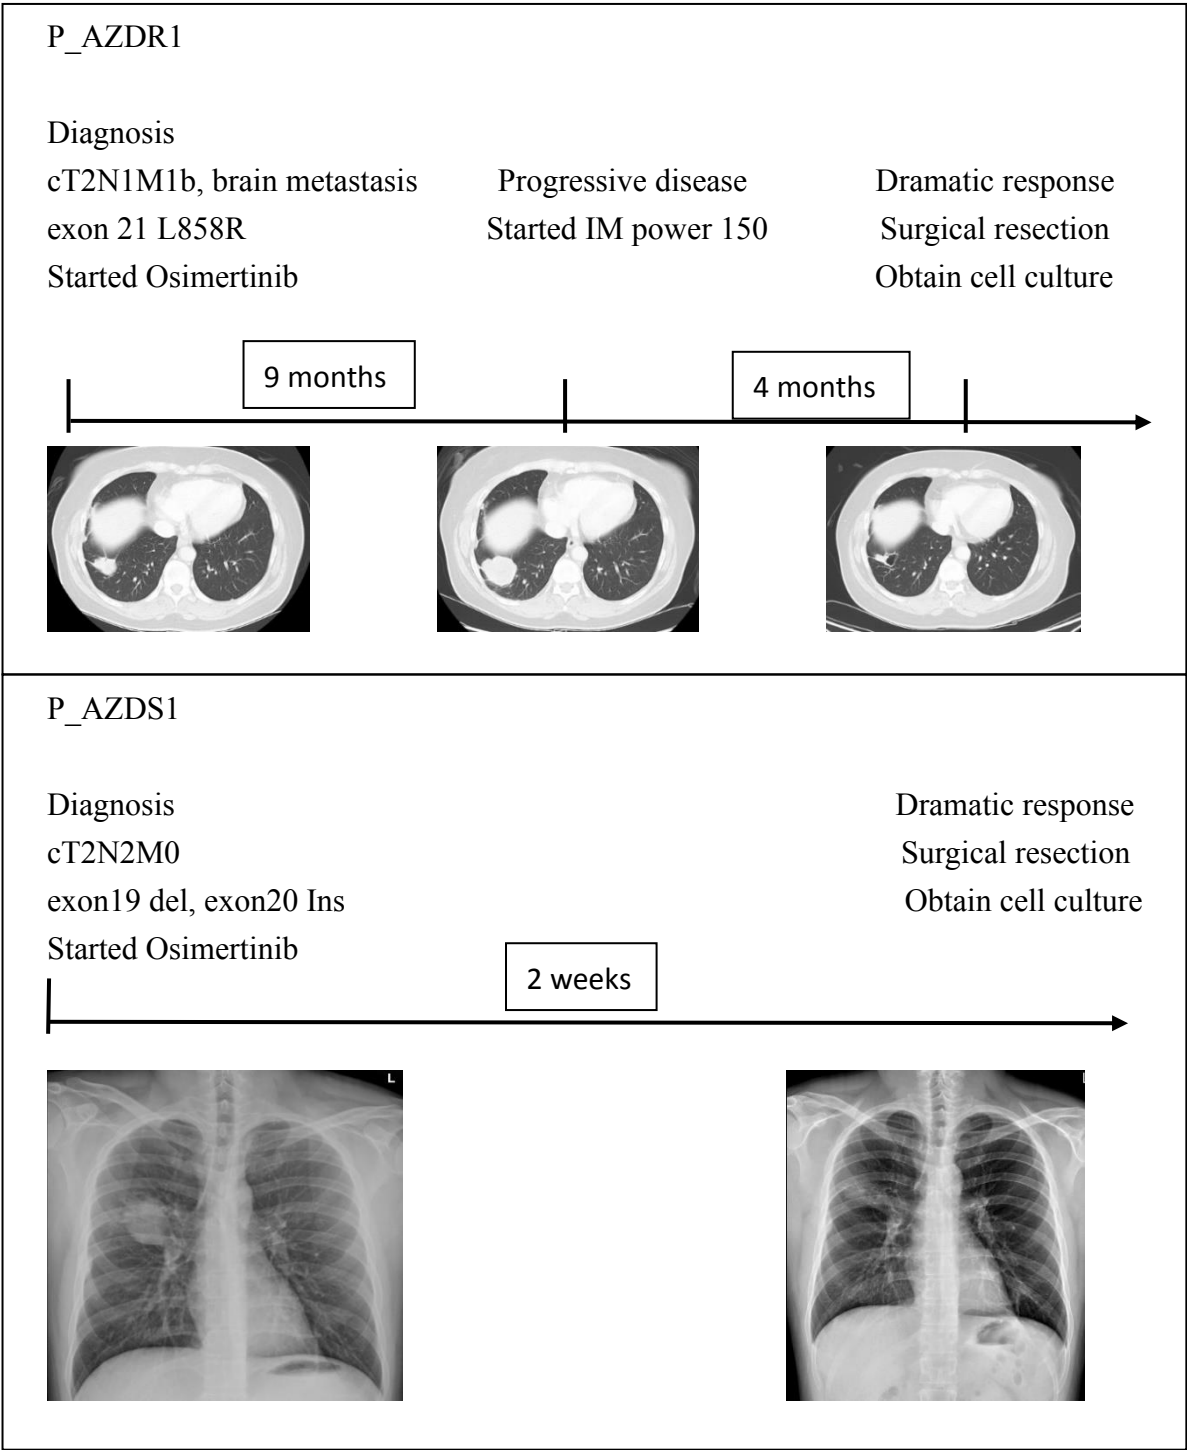

**Supplementary Figure S2** Primary cancer cell isolation process.

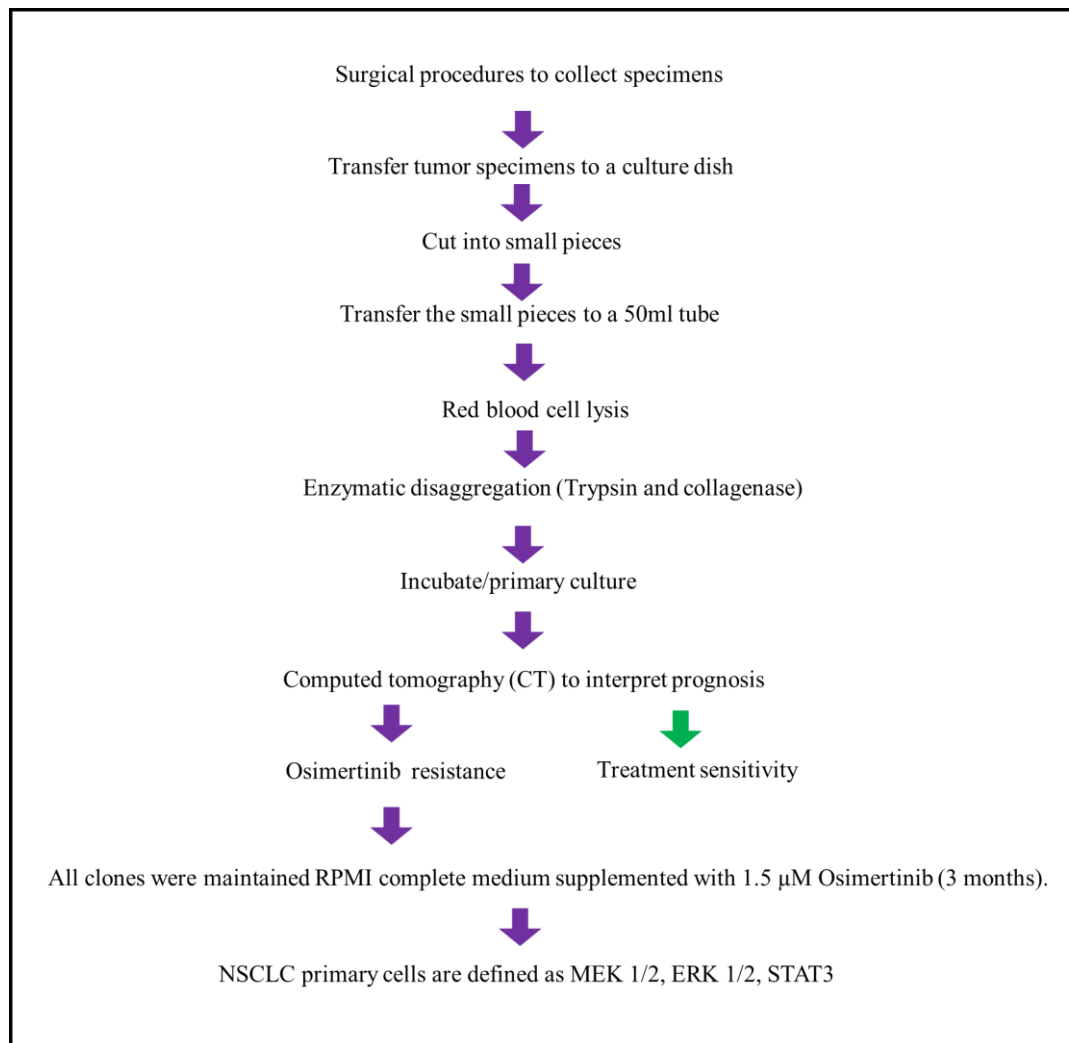

**Supplementary Figure S3** Inhibiting mir-21-5p does the job in commercial cell lines (PC9 and A549).

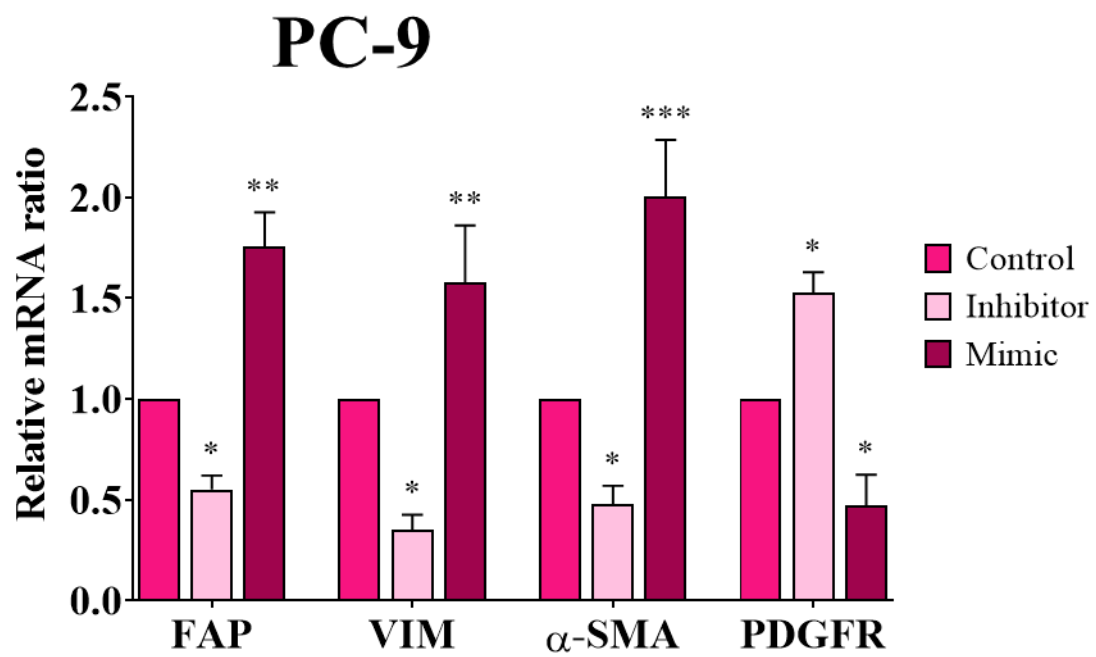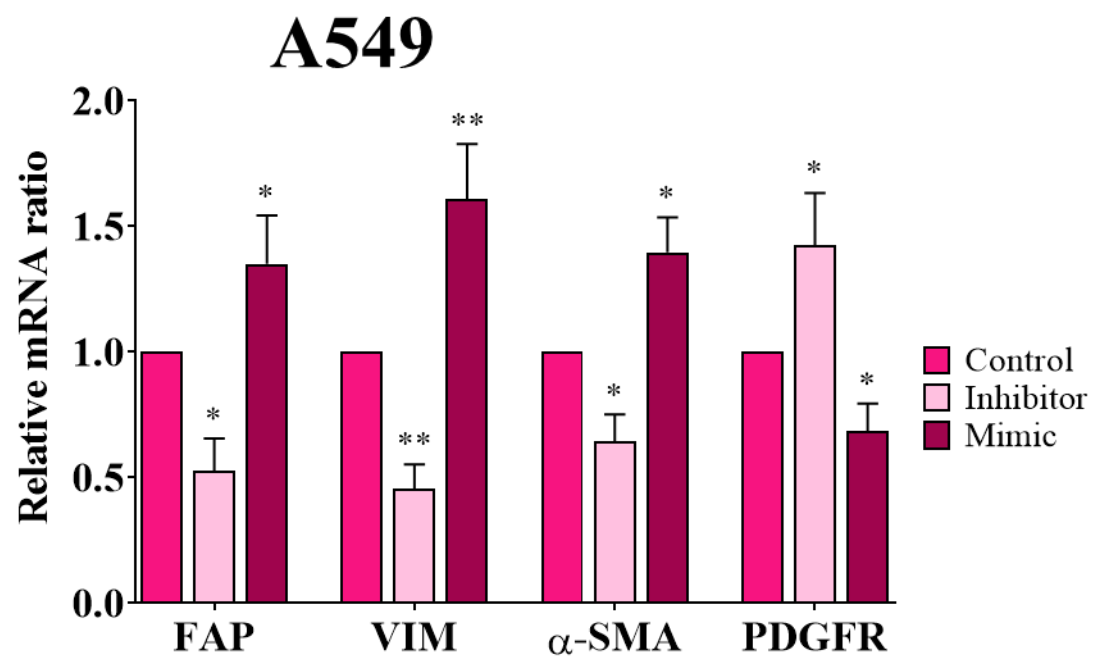

**Supplementary Figure S4.** Full-size blots of Figure 2F

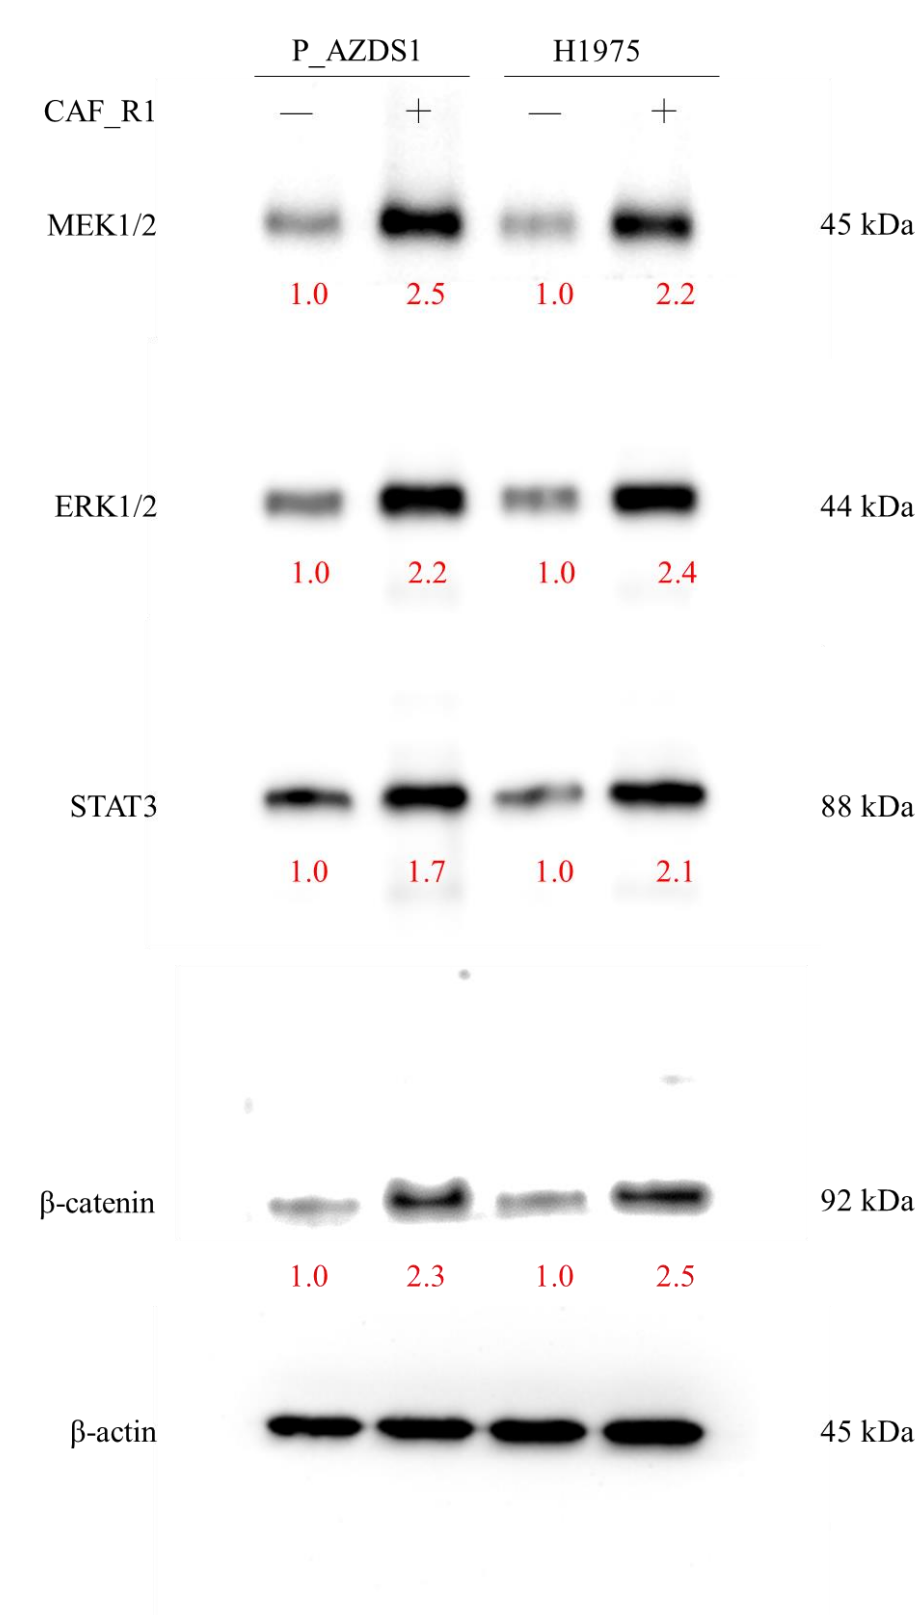

**Supplementary Figure S5.** Full-size blots of Figure 3F

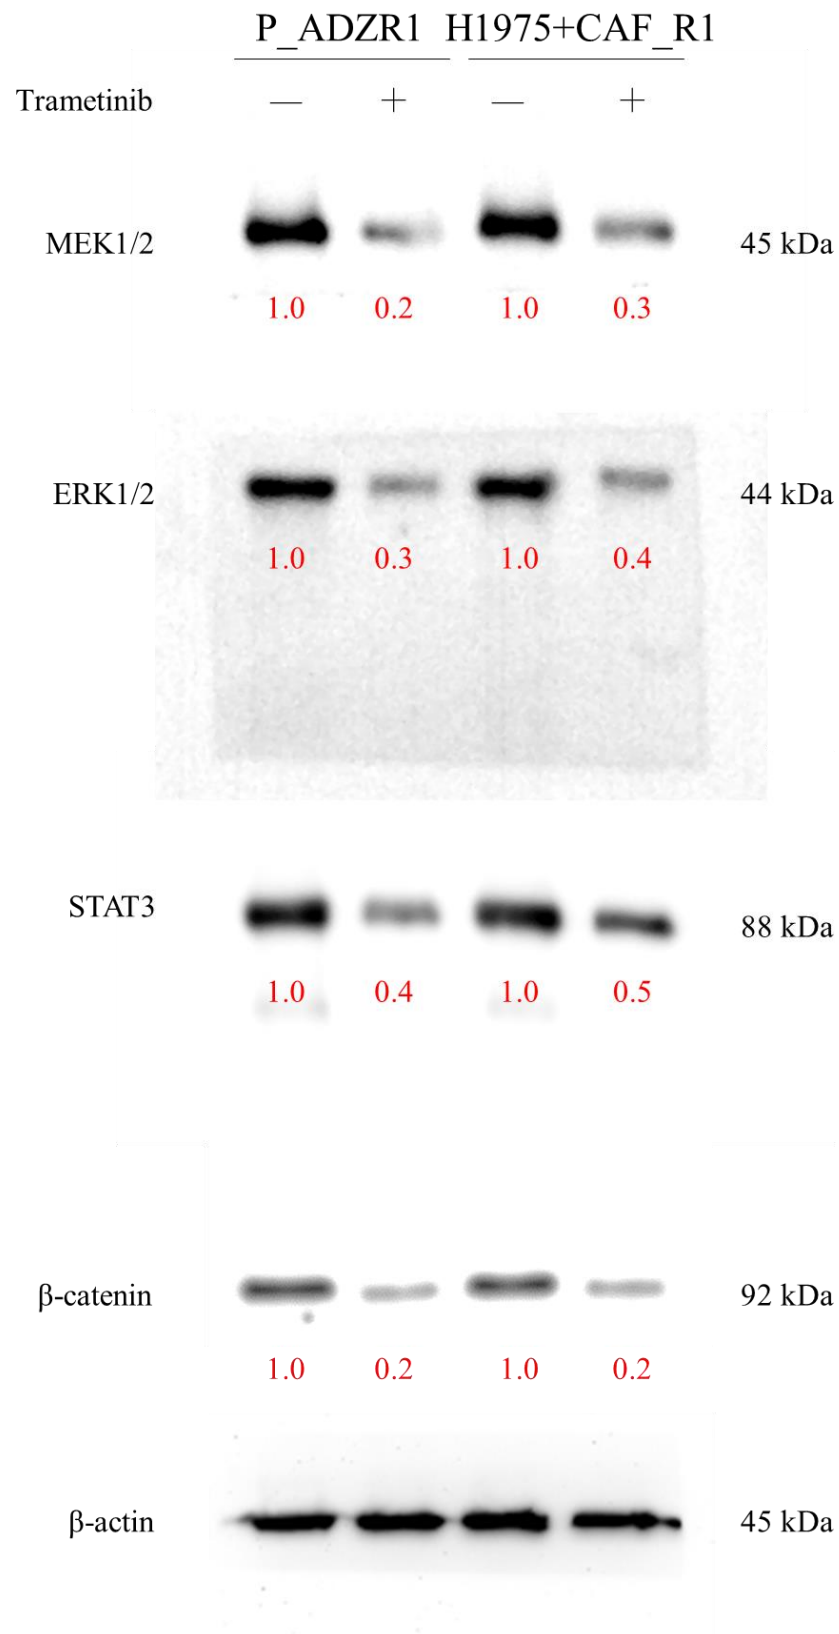



**Supplementary Figure S6.** Full-size blots of Figure 4C.

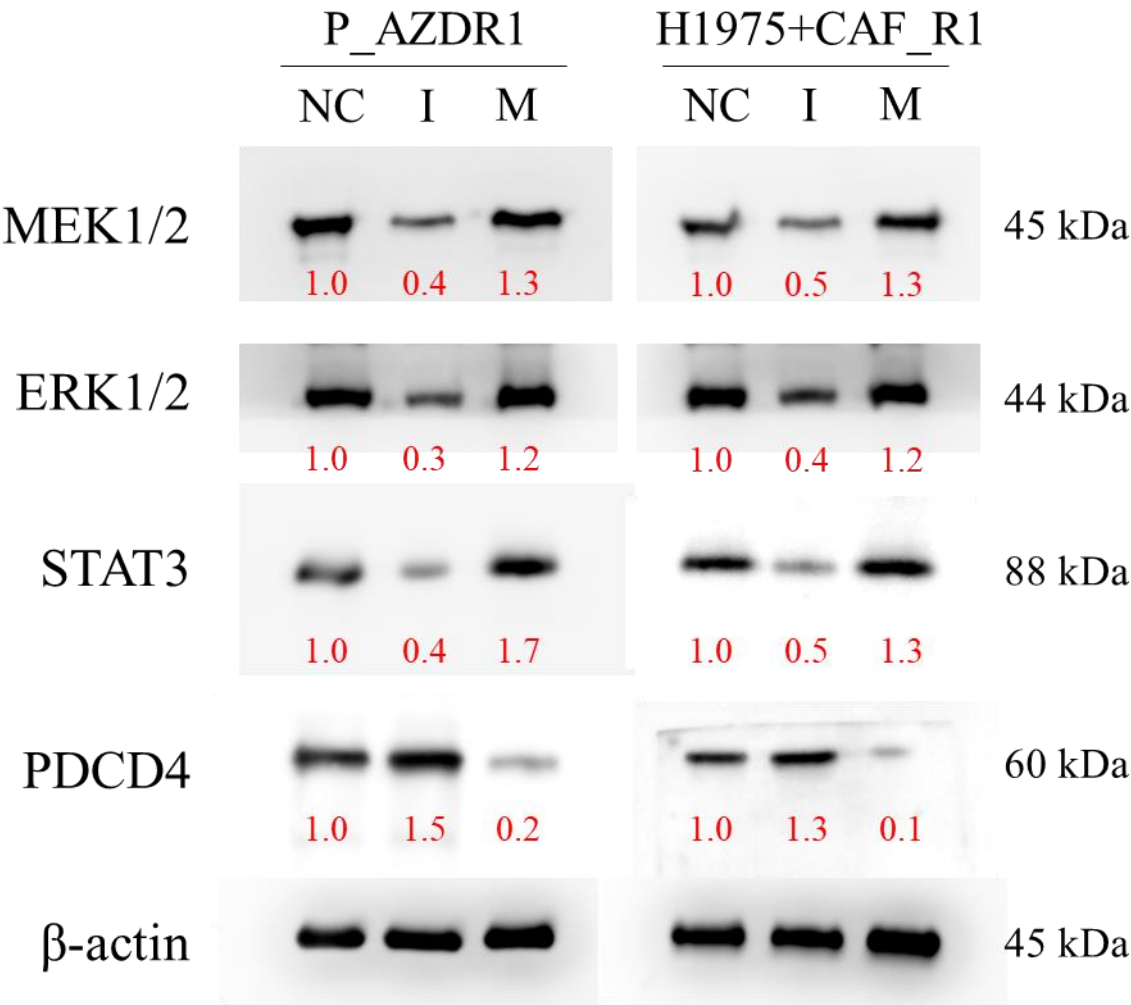

Supplement: s1 [file s1]
